# Supplementary material
Source: PubMed Central journal article supplement (PMC3322491)
Supplement: epi0601_0095SD1.pdf [file epi0601_0095SD1.pdf]

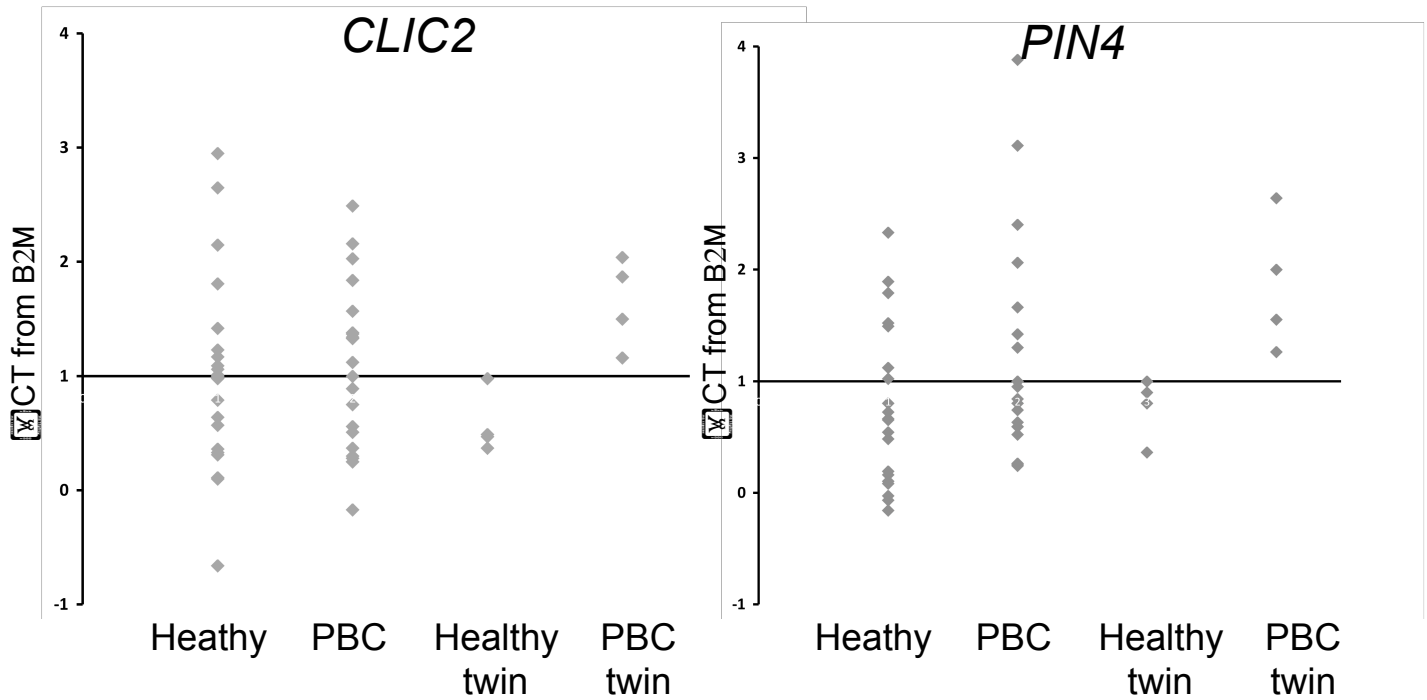

**Supplementary Figure 1.** The variation in transcript values between unrelated individuals versus discordant MZ twin pairs. Results are graphed as  $\Delta$ CT comparing each transcript (*CLIC2* or *PIN4*) to  $\beta$ 2-microglobulin (B2M) control. The average healthy control for each transcript was the calibrator, set to 1.0. A population of 20 healthy females demonstrate the normal population range compared to the pool of their sisters with PBC (also unrelated within the population). The differences in  $\Delta$ CT values for both transcripts is most apparent between MZ twin set samples, but the variation in the transcript appear to fall within the normal range for both health and PBC populations. A higher  $\Delta$ CT value is indicative of lower transcript levels in this assay.

Supplementary Table 1. Primers and gene descriptions

| #  | \$ orien-<br>tation | Gene       | Alias    | Gene Product                                        | & Y homology        | Accession | PRIMER 1                | PRIMER2                   |
|----|---------------------|------------|----------|-----------------------------------------------------|---------------------|-----------|-------------------------|---------------------------|
| 1  | +                   | UBQLN2     |          | Ubiquilin 2                                         |                     | Hs.4552   | CACCTAGTGAACCACGAGT     | GGTTTAAAGACCCATTGCG       |
| 2  | +                   | FLJ31204   |          | Hypothetical protein with mRNA & EST support        |                     | Hs.57876  | GGAGGACCTTCTGCAAGGTTA   | TCCCAGCTTGTCTCTGCT        |
| 3  | -                   | FAM9C      |          | Family with sequence similarity 9, member C         | Y homology by BLAST | Hs.276694 | CACAGAGCCAAACCTAAAAC    | GCCACAGCAGTTTCTATGATC     |
| 4  |                     | AW448933   |          | EST                                                 |                     | AW448933  | GGGCATAAATCTTCAGGGC     | GCAGCATTGTGATTACCAGCA     |
| 5  | +                   | PDZK10     |          | PDZ domain containing 10                            |                     | Hs.12308  | AGCTCTGATTTTGTGTCC      | ACCTGTTGTAATGTC           |
| 6  | +                   | REPS2      | POB1     | RALBP1 associated Eps domain containing 2           |                     | Hs.334168 | ACGAATTGCATTGGAAAACC    | TTTGTCTGCACAGCTTTTG       |
| 7  | +                   | CDKL5      | STK9     | Cyclin-dependent kinase-like 5                      |                     | Hs.50905  | AAATGGCGGAGCCAGTAC      | TGGCTACTGTCCATGTGCTC      |
| 8  |                     | Hs.435570  |          | ESTs                                                |                     | Hs.435570 | AGCATTACCTCCAAAATGTAG   | ACCTGCCAAGCTCTCAC         |
| 9  |                     | Hs.446513  |          | ESTs                                                |                     | Hs.446513 | CAGCAAGGGCAATGGCTC      | ACCCACATCTCAATATCCCAC     |
| 10 | +                   | RS1        |          | Retinoschisis (X-linked, juvenile) 1                |                     | Hs.149376 | CAGAGTTGTGCAACCATTATCA  | GTAGACAGTCCAGAAAGGCA      |
| 11 | -                   | PHKA2      |          | Phosphorylase kinase alpha 2                        |                     | Hs.54941  | TGCAATAGGGTCTCACCTGG    | TCCTCAGCTCTATCTGTGGC      |
| 12 |                     | N53651     |          | EST                                                 |                     | N53651    | AGACAGGGCTTCACTCTGTCA   | ATGCATGGTGTGCTGTG         |
| 13 |                     | Hs.444490  |          | ESTs                                                |                     | Hs.444490 | TTGACAAGTTGAAAATGCCCC   | TGGTCAACCAAGTCACTTCC      |
| 14 | -                   | ACATE2     | MT-ACT48 | Mitochondrial Acyl-CoA Thioesterase                 |                     | Hs.298885 | TGTGAGGACACGAAGCAACTACT | GGCAGCGCATTTC             |
| 15 | -                   | TAB3       | NAP1     | TAK1-binding protein 3                              | Y pseudogene        | Hs.371135 | TGGCACAAAGTTTATCTGTGC   | CCATTCCAAAATCCATTGG       |
| 16 |                     | Hs.177986  |          | ESTs                                                |                     | Hs.177986 | TCTTTGGCTCAAGGATAATCC   | CCTTTTGGCTCATTTCTGG       |
| 17 | +                   | BCoR       |          | BCL6 co-repressor                                   | Y pseudogene        | Hs.186424 | CCGGTTTGATGCGTGA AAC    | CGGCCAGGTAAAATGCTAT       |
| 18 | -                   | SYP        |          | Synaptophysin                                       |                     | Hs.75667  | GGGTTCCAGACAGGGTG       | CCGTTCCAAAGTCGTAGC        |
| 19 | +                   | CCNB3      |          | Cyclin B3                                           |                     | Hs.130310 | CAAGGGAAACACCAAGGAGA    | AGAATGGCCCTCATGTAC        |
| 20 | -                   | LOC51248   |          | Hypothetical protein with mRNA & EST support        |                     | Hs.11042  | TTTCTGCCCGAACCATCA      | CTATGTGCCATCCAGAGTCA      |
| 21 | -                   | FLJ20105   |          | Hypothetical protein with mRNA and EST support      |                     | Hs.89306  | ATCCTTGGCCCATATTTC      | CACAACCCCTGCTTTGGAAT      |
| 22 |                     | Hs.37464   |          | ESTs                                                |                     | Hs.37464  | ACATGCCCAAAGCGATTGTA    | GACTGACAAAGTTGTCACAGTTAG  |
| 23 | -                   | ABCB7      |          | ABC transporter 7, sub-family B, member             |                     | Hs.370480 | AAAGTGTGAGCCTGGAAAGC    | AAAGCTTGTGCTCTGTTCC       |
| 24 |                     | Hs.182171  |          | ESTs                                                |                     | Hs.182171 | AATCACAAAACCTTCTCAACA   | TCCTATTCAAGTGAGTCCAGATAGC |
| 25 | -                   | BTK        |          | Bruton agammaglobulinemia tyrosine kinase           |                     | Hs.159494 | AAGAGGTGCATTCCAGATG     | TACTTCTCTTCCACAAGGCC      |
| 26 | +                   | RPL36A     |          | Ribosomal protein L36a                              |                     | Hs.454495 | AGAGCAACCCAATCTTGCC     | TGCTTGGCACACTTCTTACA      |
| 27 | -                   | GLA        |          | Galactosidase, alpha                                |                     | Hs.69089  | ATGGTCTCAGAAGGCTGGAA    | GCTTCAGTCTTGTGCTGTA       |
| 28 | -                   | BEX1       |          | Brain expressed, X-linked 1                         |                     | Hs.334370 | TTTTTTTGGCTTTTAAAGTGC   | TTACGTGGAGTCTCCTATTACCA   |
| 29 | +                   | FLJ21174   |          | Hypothetical protein with mRNA & EST support        |                     | Hs.194329 | GCTAAGGTGCAGGATGAGAA    | GCCAGGGACACTACACATAA      |
| 30 | +                   | NXT2       | P15-2    | NTF2-related export protein 2                       |                     | Hs.25010  | CAGTCTAGTCTTATACGAGTAG  | AACTAGCAATAACTACATTGAAC   |
| 31 | +                   | FLJ2679    |          | Hypothetical protein with mRNA & EST support        |                     | Hs.5472   | CATTATAACAGTAAGCCCATGG  | CGCCTTTGGAATAAATGGT       |
| 32 |                     | Hs.425072  |          | ESTs                                                |                     | Hs.425072 | AAGGGGTTTCTCTACATATGG   | GTCAATAAGTAGAGGGTGGG      |
| 33 | -                   | AMMECR1    |          | Protein of unknown function                         |                     | Hs.433256 | GCTCCAAAATGCTCCCAAGT    | GGTATCTCTCATCCAGC         |
| 34 |                     | Hs.61094   |          | ESTs                                                |                     | Hs.61094  | AAGAGCATTGCAACATGCAG    | CTCTATTTTCGTGACAAGCGC     |
| 35 | +                   | PAK3       |          | p21-activated kinase 3                              |                     | Hs.390616 | GCCTATCCTTCGAGTACAAA    | TGGATTCAACACAGAGACGCA     |
| 36 | -                   | LHFPL1     |          | lipoma HMGIC fusion partner-like 1                  |                     | Hs.297420 | CAACTGGCAAGTCGTGCTAA    | GTGGTAGGAACCCAGCTGTC      |
| 37 | -                   | FLJ22965   |          | Hypothetical protein with mRNA & EST support        |                     | Hs.248572 | GTTAGAGAATTGCCATGAGG    | GTCGTTCAATGCCTTCAGT       |
| 38 | -                   | UPF3B      |          | Homolog of UPF3 regulator of nonsense transcripts   |                     | Hs.103832 | GCCTCTCTCTTCTCGAAGT     | GCTGCTCAAGAAGCCAGAAA      |
| 39 | +                   | MCTS1      |          | Malignant T cell amplified sequence 1               |                     | Hs.102696 | CTCGTTTTCCGGATAACGA     | CTATATGTTTCATGGCATCGGACT  |
| 40 | -                   | GPC4       |          | Glypican 4                                          |                     | Hs.58367  | GATCCCACTAATTTTACCG     | CCATTTTGACCACTCTGC        |
| 41 | +                   | PHF6       |          | PHD finger protein 6                                |                     | Hs.356501 | AAGAGGCACGAAGCTGATGT    | TGCTTCGGAGTTATGTGCAG      |
| 42 | -                   | MOSPD1     | DJ473B4  | motile sperm domain containing 1                    |                     | Hs.57549  | TTCAGGTCAAATTTCTGTTATTT | TGTTTAAACCATGTGAGGAGCC    |
| 43 | +                   | Hs.436787  |          | Hypothetical protein with mRNA & EST support        |                     | Hs.436787 | GACTTCCAATTCGAATGCA     | CATGTTTGGCTTCCITTTCTT     |
| 44 | -                   | CDR1       |          | Cerebellar degeneration-related protein 1           |                     | Hs.446675 | TGGTGGAAAGACCAAGTATGTC  | AGACAATCCAGTCTTCCGG       |
| 45 | +                   | SLITRK2    | CXORF2   | SLIT and NTRK-like family, member 2                 |                     | Hs.320368 | GTCTGTTTTGGGGCTGGTTT    | CGTGAGTCTCAGTGTGTAAG      |
| 46 |                     | LOC347512~ |          | Hypothetical protein with EST support               |                     | Hs.278078 | TCTGAGGAGCCTTCTCACTCC   | GGCTACTACTGGATGGAAAGG     |
| 47 | +                   | ZNF185     |          | Zinc finger protein 185                             |                     | Hs.16622  | AGTATGATTAGAAACACTAAGCA | TTCAAGGTATAGTCTGCC        |
| 48 |                     | M78874     |          | EST                                                 |                     | M78874    | CCTGTACGTGTCAACTTTGA    | GGACAGACATCAAACCGTA       |
| 49 | +                   | 23809      |          | Hypothetical protein with mRNA & EST support        |                     | AF052117  | TTAATAAGGTGTCAACGTTTAC  | CAGACCTATTTTCACTG         |
| 50 |                     | Hs.122516  |          | ESTs                                                |                     | Hs.122516 | ATTCAGCAGAGCAATAAGAGGC  | GGTGAAGGAAGATCAGAGAGG     |
| 51 | +                   | MSL3L1     |          | Male-specific lethal 3-like 1 (Drosophila)          |                     | Hs.371233 | AAGATAGCACTTTAATTTGTAGC | CTGTATGTAAGTGGTTAATAAG    |
| 52 | -                   | ASB11      |          | Ankyrin repeat and SOCS box-containing 11           |                     | Hs.352183 | AGGTCATCCACCTGTAAACC    | GCCTTCACGGAGCAAGAGT       |
| 53 | +                   | NHS        |          | Nance-Horan syndrome protein                        |                     | Hs.21470  | CTCAGTGTTTCTCCTACTGTG   | CTAATTCAGACCCGCTACCG      |
| 54 | +                   | PHEX       | PEX      | Phosphate regulating neutral endopeptidase          |                     | Hs.72874  | CACATTCACCAACAACAGC     | CTGGCCTGTGCAACTGTCT       |
| 55 | +                   | TIMP1      |          | Tissue inhibitor of metalloproteinase 1             |                     | Hs.446641 | AGATCAGCGCCAGAGAGA      | CCCTGATGACGAGGTTCGGAA     |
| 56 | +                   | MLL7       | AFX 1    | Trithorax homolog translocated in certain leukemias |                     | Hs.512585 | TGAAGACTGGCAGGAATGTG    | TCTAGTCTATGATCGCGGC       |
| 57 | -                   | PIN4       |          | Parvulin                                            |                     | Hs.11774  | TGTAAGAGAGGGTGGGGCTA    | TCCCTGAAGATGGTTTCTG       |
| 58 | +                   | COX7B      |          | Cytochrome c oxidase subunit VIIb                   |                     | Hs.432170 | AGCCACCAAGAACTACACC     | TTTGGGGTAACTCTGCAAC       |
| 59 | -                   | RAB40A     |          | RAS oncogene family member                          |                     | Hs.27453  | TTATTTCTTCTTACTGAAATGGC | GGAGGAAAACGCCAAAGATA      |
| 60 | -                   | COL4A6     |          | Collagen, type IV, alpha 6                          |                     | Hs.408    | CTGCCTCATGTCAACATAGC    | TGAAGCTGCACAGTGTGGT       |
| 61 | -                   | FLJ36576   |          | Hypothetical protein with mRNA & EST support        |                     | Hs.442518 | TCTTCAGCATAAATGGAGATGG  | CAATCACAATACGCCCTGT       |

|     |   |               |          |                                                  |                     |           |                            |                           |
|-----|---|---------------|----------|--------------------------------------------------|---------------------|-----------|----------------------------|---------------------------|
| 62  | + | UTP14A        | SDCCAG16 | U3 small nucleolar ribonucleoprotein, homolog A  |                     | Hs.271926 | TGCTCATCAGGTACGAGTGC       | TGACGTGTGGTGATTGCTTT      |
| 63  | - | COVA1         | APK1     | Cytosolic ovarian carcinoma antigen 1            |                     | Hs.155185 | CAACCGTCGTAGCGCCAATA       | CTTGTTTGCACCACACGCTG      |
| 64  | - | PLAC1         |          | Placenta-specific 1                              |                     | Hs.13026  | AAAAGGCTTAATTCATGAAGTTGC   | TCCTAGTTTGGGGTCTC         |
| 65  | - | LOC159090     |          | Hypothetical protein with mRNA & EST support     |                     | Hs.404706 | CAAGCAAGAGAATTTCTGATCA     | TCTTAGTGCCCTAAAACACCC     |
| 66  | + | MAGEA8        |          | Melanoma antigen, family A, 8                    |                     | Hs.37109  | TCAGGAAGCTGCTCAACC         | CTCCTGTCCCAAAGCCTCTT      |
| 67  | + | ABCD1         |          | ATP-binding cassette D1                          |                     | Hs.159546 | GTCACTTCAAGAGGCCAGG        | ACACCACCGTACGTGGGC        |
| 68  | + | C6.1A         |          | C6.1A gene                                       |                     | Hs.458371 | CCCAGCAGTTGTGCTCCT         | TTCAITCCAGAGCAGTATTTCCA   |
| 69  | - | CLIC2         |          | Chloride intracellular channel 2                 |                     | Hs.54570  | CCAATTGATCTTGACTCTTCC      | TCACCCTGCTCCTTAGAAAACA    |
| 70  | - | SH3KBP1       | CIN85    | SH3-domain kinase binding protein 1              |                     | Hs.153260 | CCAGTCCCTCACATCTTCA        | CAGCTGTTCCTCAAAGAGGAT     |
| 71  | + | USP11         | UHX      | Ubiquitin specific protease 11                   |                     | Hs.171501 | GGTATAAGCAGTGGGAGGCA       | GTGCGCAATACTAGGCCAAT      |
| 72  | + | WAS           |          | Wiskott-Aldrich syndrome                         |                     | Hs.2157   | ACTTGCTGCCCTGTGCTC         | AGGCAAGGATAACAGCATTG      |
| 73  | + | XEDAR         |          | Ectodysplasin A2 isoform receptor                |                     | Hs.302017 | CTCCTCGCAGGTACAAAAGC       | ACTGGAAGGCACATTGAACC      |
| 74  | + | MAGEE1        |          | Melanoma antigen, family E, 1                    |                     | Hs.8453   | TCATACAATAGCAGACAGAAAGGG   | CTTGAAGCTTGAAAAAATTTCG    |
| 75  | + | ATP7A         |          | ATPase, Cu++ transporting, alpha polypeptide     |                     | Hs.606    | GACACAGCATTCATGATGTTACC    | TGTTGTAAACCTCACTGCTTACC   |
| 76  | - | Hs.445729     |          | EST                                              |                     | Hs.445729 | TAGCCATTTTCATTTGACACAA     | CGTGGTGGTTTGTGTTAGGA      |
| 77  | - | NXF3          |          | Nuclear RNA export factor 3                      |                     | Hs.60386  | GGATCCTGGGGTAACAGG         | GGATCTGTAACAAACAAAGCC     |
| 78  | + | LOC340544     |          | Hypothetical protein with mRNA & EST support     |                     | Hs.441076 | ACTTCAAAAATACACAAAAGTAGG   | CTGGGAATGATAAAAATATGC     |
| 79  | + | PLS3          |          | plastin 3, T isoform                             |                     | Hs.430166 | GCAGACAGTTTGTACCCT         | GTTACCGAAGGTTCTTTCTTCC    |
| 80  | - | CUL4B         | KIAA0695 | Cullin 4B                                        |                     | Hs.155976 | GTTAAGGAGAACACTGCAGTC      | CTGGTTGTACACTTCTGA AAC    |
| 81  |   | Hs.108029     |          | ESTs                                             |                     | Hs.108029 | TACTAAGGATAATTTGGTGGTCTG   | GATAAAGGTACATGTTCTGCATTCT |
| 82  | + | CLCN4         |          | Chloride channel 4                               |                     | Hs.417091 | ATAGTAGAGAATTTAATCCT       | ACACCAACACTAACATTAAG      |
| 83  |   | Hs.157695     |          | ESTs                                             |                     | Hs.157695 | TTCCAGGTACACAACCTCACAGG    | TGTGGGATCACAGTCTTCA       |
| 84  | - | MORF4L2       |          | Mortality factor 4 like 2                        |                     | Hs.411358 | AATATCAACTTTTCCAGAAAACCG   | ATTGTTTCATGGTTTTTGATTTG   |
| 85  | + | MYCL2         |          | v-myc myelocytomatosis viral oncogene homolog 2  |                     | Hs.72931  | TCCTCATCTGTA AAACTGGTGG    | CCTTGGCGTATGACAACT        |
| 86  | - | BRS3          |          | Bombesin-like receptor 3                         |                     | Hs.121484 | TGCGTAAACCCCTTTGCG         | TACACCAGTGAACGAGGTC       |
| 87  | - | ARD1          | TE2      | N-acetyltransferase                              |                     | Hs.433291 | GACCTAATGAACATGCAGCACTG    | GCACCCAGCACCACGCTGCTT     |
| 88  | + | CXORF12       | ITBA1    | Protein of unknown function                      |                     | Hs.23119  | CGGAAATCACGAAATCACGG       | GTAGTGCTCATAGCCCCTAT      |
| 89  | + | FLJ23018      |          | Hypothetical protein with mRNA & EST support     |                     | Hs.169078 | ATCTAAAGCAGAGAACCATGTGC    | CAAGAGCCTTTGCTTCTGGA      |
| 90  | + | GRPR          |          | Gastrin releasing peptide receptor               |                     | Hs.73883  | CCAGAGTGTTCACATCTTCC       | CACCTACACACTCAGGAG        |
| 91  | - | CHM           | REP1     | Choroideremia                                    |                     | Hs.416244 | TCAGCCTGTTGACTGCA          | ACAGTCCAGCAGAGGAA         |
| 92  |   | HEIL2         |          | Hypothetical protein with mRNA & EST support     |                     | AB027122  | GGGATCATTTTCAGCAGCAT       | CGGAAGGGACTGAGAGTGAG      |
| 93  | - | HCFC1         |          | host cell factor C1                              |                     | Hs.83634  | AGAAGAGGTGGGAGCAGAAA       | :GAAAGCGCTCCCTCTTGG       |
| 94  | + | RIBC1         | FLJ32783 | RIB43A domain with coiled-coils 1                |                     | Hs.351743 | AAGAGTTCAGAAAACCTGCCG      | GCTGCTTCCCTTTGGTATC       |
| 95  | - | Hs.86443      |          | mRNA of unknown function                         |                     | Hs.86443  | AGCATGGAGATGCATTTTCC       | TTGCTTGCTGTTGAAAGCC       |
| 96  | + | TBL1X         |          | Transducin (beta) like 1                         | Y orthologue        | Hs.76536  | TGTAAGGGTCTGCTTTGTTCT      | TCTTCAAAGAGCGTGAGGTT      |
| 97  | - | GPR143        | OA1      | G protein-coupled receptor 143                   | Y pseudogene        | Hs.74124  | ACTGCCGAAGTGTAGCGG         | TGGACTTACACTTACTTTACAGCC  |
| 98  | - | SMC1L1        |          | Structural maintenance of chromosomes 1-like 1   |                     | Hs.211602 | AGGCATAGTGATGCTCCTGT       | CGATGTTTTGAGATCTGTGC      |
| 99  |   | Hs.258828     |          | ESTs                                             |                     | Hs.258828 | AATGAATAGCACCCAGCCAC       | CCAGACAAGTTGCTCTGCAA      |
| 100 | - | FLJ38564      |          | Hypothetical protein with mRNA & EST support     |                     | Hs.447808 | ACTCTTTAGGACTTTAGACAAAAGGC | GAAGTAGTTTCTGAGATTGTCAGCC |
| 101 |   | NAP1L3        | NPL      | Nucleosome assembly protein 1-like 3             |                     | Hs.21365  | GTGAAGCAGATTCATACAGCC      | TCACAGCTACAGTCTAACAGA     |
| 102 | + | ZD89B07       |          | full-length mRNA of unknown function             |                     | Hs.58670  | AGGGGAGAGGAATAGGCAGG       | ACAGCCAGACCAAAGGGCTA      |
| 103 | - | SYTL4         |          | Synaptotagmin-like 4                             |                     | Hs.376981 | AGTTACAGCCCGGATCC          | AACTGATTTCTATAAGCACACTGG  |
| 104 |   | Hs.527551~    |          | ESTs                                             |                     | Hs.527551 | GCATAGGACCAAGGCAGAAA       | TTAAAGGTGCGTTGACGTGG      |
| 105 | - | ARHGAP4       |          | Rho GTPase activating protein 4                  |                     | Hs.3109   | TAGACACGACCCCAAGCCAC       | CTGGACAGGGCTGGAGAGAAG     |
| 106 | - | RENBP         |          | Renin-binding protein                            |                     | Hs.158331 | TGCATTCGGAAAGGCAC          | TGGGGCAGAAAGTATACGCATC    |
| 107 |   | Hs.404298     |          | ESTs                                             |                     | Hs.404298 | AGGTTTTAGTGAGCCCTACTTC     | CAATTAAGAGAGCTTTGGAGAG    |
| 108 | + | ARMCX4        |          | Armadillo repeat containing, X-linked 4          |                     | Hs.546509 | GGTGTTCATAAAATGGTCCAGC     | TTGCACCTCTGGAAGTAATGCA    |
| 109 | - | FLJ11016      |          | Hypothetical protein with mRNA & EST support     |                     | Hs.139053 | TGTACAAGCCCTTTGGGAAG       | TCAGGATTTGCCCTCAGTTT      |
| 110 |   | Hs.333016     |          | ESTs                                             |                     | Hs.333016 | CTAGCGTTAGACTTTGGAAGG      | ACTGTCTAGGATTTTGAGAGG     |
| 111 | + | DOCK11        |          | Dedicator of cytokinesis 11                      |                     | Hs.107513 | CTTTCCCGCAGAAGTCAAAG       | CGCAGCCTCTGAAAATCTC       |
| 112 | + | LOC203427     | FLJ33985 | Hypothetical protein with mRNA & EST support     |                     | Hs.294799 | CGGCACCTGAACATTTAGGAA      | GCGGATATCATGGGCATAGT      |
| 113 | + | HSU24186      | DIAPH2   | Replication protein A 34 kd subunit homolog Rpa4 |                     | Hs.226483 | TGGGTTGCACCTCTTCCCT        | CACCTCCAACTGGCCATAAA      |
| 114 |   | Hs.271686     |          | ESTs                                             |                     | Hs.271686 | GGTCTGAGGACTGAAATCTGA      | TTCTGATGTTGGTCAGGT        |
| 115 | + | WBP5          |          | WW domain binding protein 1                      |                     | Hs.15984  | GA AAAATCATTATAATCCC       | GGCTAAGTAATATGTGAATA      |
| 116 | - | TRPC5         |          | Transient receptor potential channel 5           |                     | Hs.247868 | CACCTATTTTACTTTTCTGGCC     | CATTAGCAGAAAGTTTCTCTCA    |
| 117 | + | TNFSF5        |          | Tumor necrosis factor superfamily member 5       |                     | Hs.652    | CACCCCTGTTAACTGCCTA        | CTGGATGTCTGCATCAGTGG      |
| 118 | - | ITM2A         |          | Integral membrane protein 2A                     |                     | Hs.17109  | CAAGGCACTCTATCTGTTGCC      | ACTGGCAGTGGCAGATATC       |
| 119 | + | SRPX2         |          | sushi-repeat-containing protein, X-linked 2      |                     | Hs.306339 | ATCTCCATCTTCCATGCAG        | ACTGAGCTTGCCACTTGGTT      |
| 120 | + | KIAA1817      | CAG24    | Protein of unknown function                      |                     | Hs.157549 | GTCCACAGCCCGTAACCT         | CTCATAACAGTCCGCGAAG       |
| 121 | + | MDS031        |          | Hematopoietic stem/progenitor cell protein       |                     | Hs.110853 | AGTTTTACATTAGGCAGATT       | TGGATATGCTCTGTGAATGA      |
| 122 |   | AA348446      |          | ESTs                                             | Y homology by BLAST | Hs.546242 | AGGGATGGAACAAAAGACCC       | ATCTATGAAAATCCTCTGCTG     |
| 123 | - | DKFZP564I1922 |          | Adican                                           | Y pseudogene        | Hs.72157  | AGCAGCCACTTAGACCAGA        | TGAAAGCTGTGCTCAGAGGA      |
| 124 | - | PRKX          |          | Protein kinase, X-linked                         | Y orthologue        | Hs.147996 | CTTACGGCATAAGGCATCTC       | TTCAAACACTTCTACAGTGTGG    |
| 125 |   | Hs.431292     |          | ESTs                                             |                     | Hs.431292 | CCTGCAATTTAAAAAATGTT       | CGTGAACATGACATGAAGACA     |

## Linearized Values

### Weakest Normalized Calibrator

|         |        |           |           |                |        |          |           |           |
|---------|--------|-----------|-----------|----------------|--------|----------|-----------|-----------|
| Twin ID | 23809  | AA 348446 | ABCB7     | ABCD1          | ACATE2 | AMME CR1 | ARD1      | ARH GAP4  |
| ID1     | 5.278  | 4.228     | 2.313     | 9.580          | 9.714  | 3.074    | 3.531     | 4.469     |
| ID2     | 5.242  | 2.445     | 2.908     | 1.932          | 11.551 | 2.732    | 2.129     | 3.458     |
| ID52    | 3.182  | 3.580     | 6.916     | 3.580          | 20.393 | 8.634    | 4.595     | 4.659     |
| ID9     | 2.056  | 3.655     | 2.549     | 1.141          | 27.096 | 2.908    | 3.095     | 2.848     |
| ID54    | 10.928 | 11.236    | 5.352     | 6.498          | 10.339 | 4.028    | 5.063     | 6.821     |
| ID55    | 3.630  | -         | 2.362     | 3.340          | 16.679 | 3.010    | 2.770     | 4.891     |
| ID18    | 1.079  | -         | 1.301     | -              | 7.781  | 1.729    | 2.585     | 2.445     |
| ID19    | -      | 2.313     | 2.085     | 1.569          | 8.225  | 2.129    | 2.928     | 2.235     |
| ID24    | 1.625  | -         | 1.892     | -              | 9.254  | 2.868    | 3.364     | 3.138     |
| ID57    | 4.595  | -         | 4.757     | -              | 20.678 | 2.445    | 5.502     | 3.482     |
| Twin ID | ASB11  | ATP7A     | AW 448933 | BCoR           | BEX1   | BRS3     | BTK       | C6.1A     |
| ID1     | -      | 60.548    | 7.516     | 3.864          | 7.111  | -        | 2.676     | 4.170     |
| ID2     | -      | 63.119    | --        | 1.932          | 3.074  | -        | 2.158     | 2.462     |
| ID52    | -      | 120.259   | 18.765    | 7.013          | 8.694  | -        | 3.732     | 4.891     |
| ID9     | 5.242  | 70.522    | 6.498     | 2.479          | 15.455 | -        | 2.532     | 2.603     |
| ID54    | -      | 135.298   | -         | 3.681          | -      | -        | 4.563     | 3.317     |
| ID55    | 14.221 | 57.680    | 11.472    | 2.250          | -      | -        | 3.095     | 2.694     |
| ID18    | -      | 128.890   | -         | 1.376          | -      | -        | 1.693     | 1.000     |
| ID19    | -      | --        | 10.196    | 1.000          | 3.972  | -        | 2.346     | 1.815     |
| ID24    | -      | 140.070   | 8.056     | 2.514          | -      | -        | 1.790     | 3.918     |
| ID57    | -      | 81.008    | -         | 4.790          | -      | -        | 3.434     | 4.257     |
| Twin ID | CCNB3  | CDKL5     | CDR1      | CHM            | CLCN4  | CLIC2    | COL4A6    | COVA1     |
| ID1     | 6.774  | 5.938     | 6.190     | 3.364          | 3.117  | 5.579    | -         | 4.000     |
| ID2     | --     | 5.205     | 1.866     | 2.809          | 2.266  | 3.458    | -         | 2.412     |
| ID52    | 6.453  | 6.821     | 29.446    | 4.317          | 3.182  | 5.502    | -         | 7.013     |
| ID9     | 4.500  | 1.932     | 11.794    | 2.828          | 1.729  | 2.732    | -         | 2.990     |
| ID54    | -      | 2.099     | 6.727     | 3.605          | 6.681  | 3.918    | -         | 3.272     |
| ID55    | 14.026 | 2.462     | 7.062     | 2.445          | 4.500  | 1.879    | -         | 4.170     |
| ID18    | 4.408  | 3.458     | 3.095     | 1.790          | 1.110  | --       | -         | 1.214     |
| ID19    | 5.426  | 2.158     | 3.605     | 1.986          | 10.853 | 2.114    | -         | 2.129     |
| ID24    | 1.385  | 6.453     | 3.340     | 3.531          | 1.197  | 6.727    | -         | 2.676     |
| ID57    | -      | -         | 6.681     | 5.816          | 1.197  | 8.168    | -         | 1.840     |
| Twin ID | COX7B  | CUL4B     | CXORF 12  | DKFZP 564I1922 | DOCK11 | FAM9C    | FLJ 11016 | FLJ 20105 |
| ID1     | 3.117  | 3.010     | 22.316    | -              | 22.162 | 16.000   | 14.825    | 2.585     |
| ID2     | 2.028  | 1.705     | 19.027    | -              | 7.621  | 11.959   | 9.063     | 3.272     |
| ID52    | 2.639  | 3.655     | 59.302    | -              | 30.696 | 17.030   | 22.316    | 3.434     |
| ID9     | 1.717  | 2.114     | 19.293    | -              | 13.269 | 12.295   | 11.314    | 2.532     |

|         |            |            |            |            |            |            |            |            |
|---------|------------|------------|------------|------------|------------|------------|------------|------------|
| ID54    | 1.853      | 3.031      | 24.933     | -          | 6.869      | 41.355     | 14.221     | 4.659      |
| ID55    | 1.464      | 2.479      | 31.125     | -          | 7.516      | 5.502      | 11.632     | 1.580      |
| ID18    | 1.434      | 1.125      | 10.853     | -          | 9.714      | 8.056      | --         | 2.042      |
| ID19    | -          | 5.540      | 5.776      | -          | 4.857      | 7.362      | 5.242      | 1.240      |
| ID24    | 2.297      | 1.464      | 7.311      | -          | 2.949      | 8.340      | 12.729     | 1.945      |
| ID57    | 3.117      | 3.891      | -          | -          | 50.213     | 213.783    | 38.586     | 9.126      |
| Twin ID | FLJ 21174  | FLJ 22679  | FLJ 22965  | FLJ 23018  | FLJ 31204  | FLJ 36576  | FLJ 38564  | GLA        |
| ID1     | 6.233      | 9.580      | 2.848      | 5.618      | 5.856      | 3.580      | 3.434      | 2.514      |
| ID2     | 6.233      | 8.225      | 1.972      | 4.757      | 3.811      | 2.532      | 4.857      | 2.713      |
| ID52    | 14.221     | 5.979      | 2.479      | 8.515      | 5.897      | 2.497      | 6.453      | 3.732      |
| ID9     | 4.469      | 3.182      | 2.173      | 1.959      | 4.112      | 1.670      | 2.828      | 3.681      |
| ID54    | 7.413      | 17.509     | 6.320      | 6.320      | 5.134      | 4.347      | 6.190      | 4.595      |
| ID55    | 5.897      | 9.714      | 1.778      | 1.945      | 1.945      | 1.670      | 3.918      | 2.639      |
| ID18    | 1.602      | 7.362      | --         | 1.670      | 1.647      | 1.117      | 2.346      | 2.028      |
| ID19    | 2.056      | 7.062      | 1.310      | 2.204      | 1.495      | 2.250      | 5.816      | 2.282      |
| ID24    | 6.774      | 14.825     | 1.682      | --         | 3.053      | 2.297      | 4.891      | 2.514      |
| ID57    | 26.723     | 12.295     | 3.891      | 33.591     | 11.876     | 4.563      | 1.705      | 4.170      |
| Twin ID | GPC4       | GPR143     | GRPR       | HCFC1      | HEIL2      | Hs. 108029 | Hs. 122516 | Hs. 157695 |
| ID1     | 31.559     | 4.595      | 3.506      | 8.398      | 4.408      | 2.158      | 1.526      | 10.196     |
| ID2     | 27.474     | 3.272      | 3.317      | 5.028      | 3.074      | 2.235      | -          | 6.916      |
| ID52    | 8.515      | -          | 4.500      | 22.162     | 2.395      | 3.182      | 7.516      | 9.000      |
| ID9     | 5.579      | 4.627      | 3.364      | 4.500      | 3.010      | 2.219      | 3.506      | 5.579      |
| ID54    | 32.900     | -          | 3.434      | 2.567      | 5.776      | 3.227      | 2.014      | 13.269     |
| ID55    | 56.493     | -          | 2.514      | 4.000      | 2.158      | 2.129      | 8.574      | 5.352      |
| ID18    | 3.918      | 2.158      | --         | 1.157      | 1.197      | 2.297      | 8.000      | 2.828      |
| ID19    | 4.257      | -          | 1.803      | 1.057      | 2.770      | 1.414      | -          | 2.585      |
| ID24    | 3.706      | -          | 1.485      | 3.294      | 2.235      | 2.114      | 18.765     | 6.320      |
| ID57    | 33.591     | -          | 3.387      | 4.691      | 4.724      | 1.705      | -          | 23.918     |
| Twin ID | Hs. 177986 | Hs. 182171 | Hs. 258828 | Hs. 37464  | Hs. 404298 | Hs. 425072 | Hs. 431292 | Hs. 435570 |
| ID1     | 5.242      | 2.789      | 9.580      | 2.445      | 4.500      | 11.713     | -          | 10.126     |
| ID2     | 7.621      | 2.532      | 13.454     | 2.071      | 3.074      | 6.821      | -          | 7.835      |
| ID52    | 3.945      | 4.377      | 12.553     | 5.134      | 3.117      | 3.160      | -          | 8.398      |
| ID9     | 3.706      | 2.173      | 15.455     | 2.789      | 2.751      | 5.540      | -          | 5.169      |
| ID54    | 56.103     | 3.630      | 22.943     | 4.532      | 5.502      | 12.996     | -          | 12.295     |
| ID55    | 19.160     | 2.514      | 22.627     | 2.479      | 2.099      | 28.443     | -          | 10.483     |
| ID18    | 24.933     | 1.647      | 14.420     | 1.338      | 1.424      | 13.737     | -          | 1.972      |
| ID19    | 19.835     | 1.853      | 5.426      | 2.250      | 2.694      | 9.849      | -          | 3.317      |
| ID24    | 5.618      | 2.282      | 7.311      | 1.765      | 2.235      | 23.264     | -          | 5.776      |
| ID57    | -          | 6.589      | 12.295     | 7.260      | 7.013      | -          | -          | 8.398      |
| Twin ID | Hs. 436787 | Hs. 444490 | Hs. 445729 | Hs. 446513 | Hs. 527551 | Hs. 61094  | Hs. 86443  | HSU 24186  |

|         |        |           |         |            |            |            |            |           |
|---------|--------|-----------|---------|------------|------------|------------|------------|-----------|
| ID1     | 2.868  | -         | 2.250   | 2.585      | 2.250      | -          | 3.053      | 3.340     |
| ID2     | 2.428  | 2.809     | 2.789   | 18.252     | 1.613      | -          | --         | 2.497     |
| ID52    | 3.138  | -         | 6.774   | 4.757      | 4.857      | -          | -          | 2.071     |
| ID9     | 2.099  | -         | 2.639   | 10.629     | 1.778      | -          | 3.227      | 2.412     |
| ID54    | 4.959  | 4.084     | 4.823   | -          | 4.317      | -          | -          | 7.160     |
| ID55    | 1.485  | -         | 3.074   | 31.779     | 2.297      | -          | -          | 1.558     |
| ID18    | 1.240  | 35.506    | 1.613   | -          | 1.376      | -          | -          | 2.532     |
| ID19    | 1.231  | -         | -       | 5.579      | 1.424      | -          | -          | 2.144     |
| ID24    | 1.853  | -         | 1.613   | 6.916      | 1.558      | -          | -          | 3.340     |
| ID57    | 6.727  | -         | 3.605   | -          | 4.438      | -          | -          | 2.969     |
| Twin ID | ITM2A  | KIAA 1817 | LHFPL1  | LOC 159090 | LOC 203427 | LOC 340544 | LOC 347512 | LOC 51248 |
| ID1     | 5.856  | 10.411    | 11.392  | 3.160      | 4.317      | 3.605      | -          | 4.377     |
| ID2     | 3.249  | 37.014    | 9.318   | 2.144      | 6.498      | 1.892      | -          | 4.724     |
| ID52    | 12.042 | 109.896   | 15.889  | 3.010      | 10.056     | 2.585      | -          | 11.794    |
| ID9     | 4.659  | 13.929    | 6.635   | 2.603      | 7.260      | 1.778      | -          | 3.972     |
| ID54    | 6.233  | 66.257    | 7.413   | 2.173      | 23.918     | 2.949      | -          | 7.413     |
| ID55    | 5.063  | 24.251    | 22.162  | 2.789      | -          | --         | -          | 3.506     |
| ID18    | 3.732  | 24.251    | 5.657   | 2.129      | -          | 1.050      | -          | 2.603     |
| ID19    | 4.595  | 30.484    | 10.056  | 1.659      | -          | 1.157      | -          | 2.639     |
| ID24    | 3.482  | 1.569     | 8.398   | 2.621      | 1.892      | 2.362      | -          | 3.117     |
| ID57    | 4.857  | -         | -       | 2.848      | -          | 7.413      | -          | 6.727     |
| Twin ID | M78874 | MAGEA8    | MAGEE1  | MCTS1      | MDS031     | MLL7       | MORF4L2    | MOSPD1    |
| ID1     | -      | 18.896    | 71.506  | 3.272      | 2.621      | 2.639      | 6.821      | 31.125    |
| ID2     | -      | 10.703    | 48.503  | 2.412      | 3.010      | 1.815      | 17.268     | 36.758    |
| ID52    | --     | 22.943    | 162.017 | 3.630      | 3.160      | 4.823      | 23.752     | 56.886    |
| ID9     | -      | 7.568     | 44.942  | 2.514      | 1.778      | 2.713      | 12.126     | 51.625    |
| ID54    | -      | 27.284    | 85.627  | 4.500      | 4.000      | 3.294      | 12.295     | 49.867    |
| ID55    | -      | -         | 95.010  | 1.591      | 1.248      | 1.197      | 14.520     | 29.041    |
| ID18    | -      | -         | 34.060  | 1.266      | 1.647      | 4.595      | 8.398      | 22.471    |
| ID19    | -      | 15.137    | --      | 1.803      | 1.840      | -          | 2.567      | 25.281    |
| ID24    | -      | -         | 39.671  | 1.945      | 1.892      | 4.532      | 1.000      | 15.562    |
| ID57    | -      | -         | 62.250  | 5.028      | 7.674      | 4.823      | 17.753     | 53.076    |
| Twin ID | MSL3L1 | MYCL2     | N53651  | NAP1L3     | NHS        | NXF3       | NXT2       | PAK3      |
| ID1     | 27.474 | 1.853     | 22.627  | 5.134      | 5.856      | 10.196     | 2.144      | 9.580     |
| ID2     | 26.909 | 2.000     | 14.420  | 4.438      | 11.158     | 3.758      | 2.071      | 5.389     |
| ID52    | 38.319 | -         | 11.713  | 9.254      | 14.723     | -          | 6.869      | 14.825    |
| ID9     | 23.752 | -         | 10.196  | 4.563      | 7.413      | 12.996     | 1.959      | 5.897     |
| ID54    | 36.504 | -         | 25.813  | 8.815      | 20.678     | 7.013      | 4.170      | 16.912    |
| ID55    | 22.943 | -         | 14.420  | 3.506      | 6.727      | 8.754      | 3.945      | -         |
| ID18    | 12.126 | -         | 6.869   | 4.563      | 4.438      | -          | 2.189      | 7.727     |

|         |        |        |         |        |        |       |          |         |
|---------|--------|--------|---------|--------|--------|-------|----------|---------|
| ID19    | -      | -      | 9.580   | 1.959  | -      | --    | 2.014    | 5.897   |
| ID24    | 2.428  | -      | 11.551  | 4.757  | 5.979  | -     | 1.434    | 5.169   |
| ID57    | 32.672 | -      | 20.678  | -      | -      | -     | 1.189    | -       |
| Twin ID | PDZK10 | PHEX   | PHF6    | PHKA2  | PIN4   | PLAC1 | PLS3     | PRKX    |
| ID1     | -      | 1.079  | 7.111   | 3.074  | 16.111 | -     | 4.993    | 2.990   |
| ID2     | -      | -      | 5.696   | 2.751  | 21.112 | -     | 3.605    | 3.387   |
| ID52    | -      | 5.352  | 16.450  | 2.990  | 22.471 | -     | 12.641   | 9.000   |
| ID9     | 3.758  | 1.181  | 6.148   | 1.840  | 8.112  | -     | 5.205    | 4.000   |
| ID54    | 4.563  | 10.483 | 8.815   | 4.028  | 39.397 | -     | 40.504   | 4.959   |
| ID55    | -      | 8.000  | 6.916   | 1.972  | 17.268 | -     | 5.205    | 3.811   |
| ID18    | -      | -      | 5.098   | --     | 10.056 | -     | 18.765   | 1.986   |
| ID19    | -      | -      | 3.945   | 1.424  | -      | -     | 2610.300 | 1.682   |
| ID24    | -      | 5.540  | 4.724   | 2.219  | 7.210  | -     | 4.959    | 2.809   |
| ID57    | -      | 61.820 | 8.754   | 3.458  | 5.856  | -     | -        | 2.888   |
| Twin ID | RAB40A | RENBP  | REPS2   | RIBC1  | RPL36A | RS1   | SH3KBP1  | SLITRK2 |
| ID1     | 4.959  | 3.160  | 108.383 | 3.434  | 3.555  | --    | 3.117    | -       |
| ID2     | 6.727  | 1.613  | 116.162 | 6.727  | 2.603  | 4.170 | 2.158    | -       |
| ID52    | 5.657  | 1.866  | 121.938 | 2.428  | 7.062  | -     | 4.257    | -       |
| ID9     | 11.876 | 1.729  | 113.772 | 3.117  | 2.888  | -     | 2.549    | -       |
| ID54    | 35.753 | 3.182  | 205.074 | 9.448  | 3.630  | -     | 3.249    | -       |
| ID55    | 12.641 | 2.144  | 124.500 | --     | 1.790  | -     | 2.809    | -       |
| ID18    | 12.126 | 1.035  | 156.498 | 4.469  | 2.204  | -     | 1.035    | -       |
| ID19    | -      | --     | 93.701  | 4.056  | 2.266  | -     | 1.516    | -       |
| ID24    | 10.339 | 3.555  | 168.897 | 1.173  | 3.758  | -     | 2.219    | -       |
| ID57    | -      | 5.897  | 198.088 | -      | 8.877  | -     | 3.317    | -       |
| Twin ID | SMC1L1 | SRPX2  | SYP     | SYTL4  | TAB3   | TBL1X | TIMP1    | TNFRSF5 |
| ID1     | 4.532  | 1.014  | -       | 2.250  | 2.297  | 2.751 | 3.531    | 7.945   |
| ID2     | 3.160  | 3.434  | -       | 4.056  | 1.717  | 1.376 | 2.412    | 5.464   |
| ID52    | 5.816  | 2.129  | -       | 4.000  | 5.205  | 2.868 | 2.639    | 19.427  |
| ID9     | 3.506  | -      | -       | 3.095  | 2.282  | 2.000 | 1.959    | 7.945   |
| ID54    | 2.639  | -      | -       | 10.196 | 2.532  | 3.204 | 4.056    | 5.315   |
| ID55    | 4.724  | -      | -       | 5.205  | 1.434  | 2.395 | 4.112    | 5.856   |
| ID18    | --     | -      | -       | 1.636  | --     | 1.231 | 1.464    | 1.892   |
| ID19    | 1.157  | 2.378  | -       | 2.189  | 1.347  | 1.021 | -        | 3.732   |
| ID24    | 2.445  | -      | -       | --     | 5.242  | 3.784 | 1.972    | 2.713   |
| ID57    | 8.938  | -      | -       | 6.681  | 3.364  | 2.694 | 2.479    | 13.737  |
| Twin ID | TRPC5  | UBQLN2 | UPF3B   | USP11  | UTP14A | WAS   | WBP5     | XEDAR   |
| ID1     | -      | 5.315  | 2.990   | 3.031  | 3.580  | 3.706 | 3.160    | 4.993   |
| ID2     | -      | 3.053  | 2.514   | 2.532  | 3.249  | 2.621 | 4.257    | 2.549   |
| ID52    | -      | 4.823  | 3.272   | 6.916  | 5.618  | 2.282 | 2.694    | 2.657   |

|         |         |        |       |       |       |       |       |         |
|---------|---------|--------|-------|-------|-------|-------|-------|---------|
| ID9     | -       | 2.603  | 2.189 | 2.313 | 3.317 | 2.235 | 2.949 | 1.102   |
| ID54    | -       | 2.949  | 3.811 | 2.969 | 3.706 | 2.657 | 5.389 | 2.099   |
| ID55    | -       | 2.549  | 2.028 | 3.031 | 3.482 | 2.282 | 3.482 | -       |
| ID18    | -       | 1.042  | 1.000 | 1.404 | 1.347 | 1.035 | 3.732 | -       |
| ID19    | -       | 1.347  | 2.235 | 7.210 | 3.204 | 1.434 | 1.828 | 107.635 |
| ID24    | -       | 2.868  | 2.751 | 3.227 | 3.249 | 2.888 | 1.149 | -       |
| ID57    | -       | 2.428  | 6.105 | 2.266 | 6.916 | 4.563 | 5.736 | -       |
| Twin ID | ZD89B07 | ZNF185 |       |       |       |       |       |         |
| ID1     | -       | 7.890  |       |       |       |       |       |         |
| ID2     | -       | 6.727  |       |       |       |       |       |         |
| ID52    | -       | 9.918  |       |       |       |       |       |         |
| ID9     | -       | 7.210  |       |       |       |       |       |         |
| ID54    | -       | 14.026 |       |       |       |       |       |         |
| ID55    | -       | 11.236 |       |       |       |       |       |         |
| ID18    | -       | 7.674  |       |       |       |       |       |         |
| ID19    | -       | 6.233  |       |       |       |       |       |         |
| ID24    | -       | 1.602  |       |       |       |       |       |         |
| ID57    | -       | 12.126 |       |       |       |       |       |         |
